# Supplementary material for: Androgens predispose males to monocyte-mediated immunopathology by inducing the expression of leukocyte recruitment factor CXCL1
Source: PubMed Central journal article supplement (PMC7351718; doi:10.1038/s41467-020-17260-y), 2020-07-10
Supplement: 41467_2020_17260_MOESM3_ESM.pdf [file 41467_2020_17260_MOESM3_ESM.pdf]

## Reporting Summary

Nature Research wishes to improve the reproducibility of the work that we publish. This form provides structure for consistency and transparency in reporting. For further information on Nature Research policies, see [Authors & Referees](#) and the [Editorial Policy Checklist](#).

### Statistics

For all statistical analyses, confirm that the following items are present in the figure legend, table legend, main text, or Methods section.

n/a Confirmed

- |                                     |                                     |                                                                                                                                                                                                                                                            |
|-------------------------------------|-------------------------------------|------------------------------------------------------------------------------------------------------------------------------------------------------------------------------------------------------------------------------------------------------------|
| <input type="checkbox"/>            | <input checked="" type="checkbox"/> | The exact sample size ( $n$ ) for each experimental group/condition, given as a discrete number and unit of measurement                                                                                                                                    |
| <input type="checkbox"/>            | <input checked="" type="checkbox"/> | A statement on whether measurements were taken from distinct samples or whether the same sample was measured repeatedly                                                                                                                                    |
| <input type="checkbox"/>            | <input checked="" type="checkbox"/> | The statistical test(s) used AND whether they are one- or two-sided<br><i>Only common tests should be described solely by name; describe more complex techniques in the Methods section.</i>                                                               |
| <input type="checkbox"/>            | <input checked="" type="checkbox"/> | A description of all covariates tested                                                                                                                                                                                                                     |
| <input type="checkbox"/>            | <input checked="" type="checkbox"/> | A description of any assumptions or corrections, such as tests of normality and adjustment for multiple comparisons                                                                                                                                        |
| <input checked="" type="checkbox"/> | <input type="checkbox"/>            | A full description of the statistical parameters including central tendency (e.g. means) or other basic estimates (e.g. regression coefficient) AND variation (e.g. standard deviation) or associated estimates of uncertainty (e.g. confidence intervals) |
| <input checked="" type="checkbox"/> | <input type="checkbox"/>            | For null hypothesis testing, the test statistic (e.g. $F$ , $t$ , $r$ ) with confidence intervals, effect sizes, degrees of freedom and $P$ value noted<br><i>Give <math>P</math> values as exact values whenever suitable.</i>                            |
| <input checked="" type="checkbox"/> | <input type="checkbox"/>            | For Bayesian analysis, information on the choice of priors and Markov chain Monte Carlo settings                                                                                                                                                           |
| <input checked="" type="checkbox"/> | <input type="checkbox"/>            | For hierarchical and complex designs, identification of the appropriate level for tests and full reporting of outcomes                                                                                                                                     |
| <input checked="" type="checkbox"/> | <input type="checkbox"/>            | Estimates of effect sizes (e.g. Cohen's $d$ , Pearson's $r$ ), indicating how they were calculated                                                                                                                                                         |

*Our web collection on [statistics for biologists](#) contains articles on many of the points above.*

### Software and code

Policy information about [availability of computer code](#)

Data collection

The BD LSRFortessa was controlled by the BD FACSDiva V8 software. The MRI screening was controlled by NUMARIS/4 syngo MR B15. The data collection of the RT-PCR was performed by the Roche Lightcycler® 96 software. The measurement of optical densities of ELISA experiments was performed with the MRX® and controlled by the Revelation™ software. RNAseq data from RNA samples was performed and collected by BGI Genomics.

Data analysis

Abscess volumes were analyzed using either the Osirix DICOM Viewer or ImageJ. Flow cytometry analysis was performed by FlowJo V10. HSNE analysis was performed by cytosplere Version 2.2.1.. LEGENDplex™ analysis was conducted with the LEGENDplex data analysis software V8.0. Analysis of RNAseq data was conducted using HISAT2 and featureCounts including the subreads package. Further transcriptomic analysis were performed using the Deseq2 software, GOrilla and Panther GO-slim algorithm as well as with the heatmapr.ca software. Statistical analysis were performed with Graphpad Prism V8.1.2.

For manuscripts utilizing custom algorithms or software that are central to the research but not yet described in published literature, software must be made available to editors/reviewers. We strongly encourage code deposition in a community repository (e.g. GitHub). See the Nature Research [guidelines for submitting code & software](#) for further information.

### Data

Policy information about [availability of data](#)

All manuscripts must include a [data availability statement](#). This statement should provide the following information, where applicable:

- Accession codes, unique identifiers, or web links for publicly available datasets
- A list of figures that have associated raw data
- A description of any restrictions on data availability

The data that support the findings of this study are available from the corresponding author upon reasonable request.

## Field-specific reporting

Please select the one below that is the best fit for your research. If you are not sure, read the appropriate sections before making your selection.

Life sciences  Behavioural & social sciences  Ecological, evolutionary & environmental sciences

For a reference copy of the document with all sections, see [nature.com/documents/nr-reporting-summary-flat.pdf](https://www.nature.com/documents/nr-reporting-summary-flat.pdf)

## Life sciences study design

All studies must disclose on these points even when the disclosure is negative.

|                 |                                                                                                                                                                                                                                                                               |
|-----------------|-------------------------------------------------------------------------------------------------------------------------------------------------------------------------------------------------------------------------------------------------------------------------------|
| Sample size     | No statistical method was used to determine sample size. Sample size were chosen based on previous experience. Especially animal experiments needed to fit the 3R rule, but enough to fit profound statistical calculations. Human data were collected based on availability. |
| Data exclusions | No data were excluded from the analysis, except for RNAseq analysis. The purity of the isolated CD14 positive monocytes had to reach at least 90 %.                                                                                                                           |
| Replication     | Animal experiments were done in duplicate. Human data were done once. All other experiments were conducted in triplicate. All attempts of replication were successful and gave similar results.                                                                               |
| Randomization   | Male and female mice couldn't sit together in randomized groups, but animals were assigned randomly to experimental and control groups.                                                                                                                                       |
| Blinding        | The investigators were not blinded during data collection, but the FlowJo analysis were conducted blinded.                                                                                                                                                                    |

## Reporting for specific materials, systems and methods

We require information from authors about some types of materials, experimental systems and methods used in many studies. Here, indicate whether each material, system or method listed is relevant to your study. If you are not sure if a list item applies to your research, read the appropriate section before selecting a response.

### Materials & experimental systems

| n/a                                 | Involved in the study                                           |
|-------------------------------------|-----------------------------------------------------------------|
| <input type="checkbox"/>            | <input checked="" type="checkbox"/> Antibodies                  |
| <input checked="" type="checkbox"/> | <input type="checkbox"/> Eukaryotic cell lines                  |
| <input checked="" type="checkbox"/> | <input type="checkbox"/> Palaeontology                          |
| <input type="checkbox"/>            | <input checked="" type="checkbox"/> Animals and other organisms |
| <input type="checkbox"/>            | <input checked="" type="checkbox"/> Human research participants |
| <input checked="" type="checkbox"/> | <input type="checkbox"/> Clinical data                          |

### Methods

| n/a                                 | Involved in the study                                      |
|-------------------------------------|------------------------------------------------------------|
| <input checked="" type="checkbox"/> | <input type="checkbox"/> ChIP-seq                          |
| <input type="checkbox"/>            | <input checked="" type="checkbox"/> Flow cytometry         |
| <input type="checkbox"/>            | <input checked="" type="checkbox"/> MRI-based neuroimaging |

## Antibodies

### Antibodies used

Antibodies against murine epitopes:  
 BioLegend; CD11b; BV510; clone: M1/70; lot: B265262  
 BioLegend; CD86; AF700; clone: GL-1; lot: B268638  
 BioLegend; CCR2; PE-Cy7; clone: SA203G11; lot: B241310  
 BioLegend; Ly6C; FITC; clone: HK1-4; lot: B247728  
 BioLegend; Ly6C; PE; clone: HK1-4; lot: B148724  
 BioLegend; Ly6C; PerCP/C5.5; clone: HK1-4; lot: E10161-1631  
 BioLegend; Ly6G; APC-Cy7; clone: 1A8; lot: B264760  
 BioLegend; Ly6G; AF700; clone: 1A8; lot: B166379  
 BioLegend; Ly6G; BV785; clone: 1A8; lot: B262919  
 BioLegend; CX3CR1; PerCP/5.5; clone: SA011F11; lot: B250966  
 BioLegend; TNFalpha; BV421; clone: MP6-XT22; lot: B205119  
 BioLegend; CCL2; PE; clone: 2H5; lot: B273678  
 R&D; CXCL1; Alexa Fluor 647; clone: 1174A; lot: 1518157

Antibodies against human epitopes:  
 BioLegend; CD14; Alexa Fluor 700; clone: M5E2; lot: B239383  
 BioLegend; CD14; PerCP/Cy5.5; clone: M5E2; lot: B239204  
 BioLegend; CD16; PerCP; clone: 3G8; lot: B235385  
 BioLegend; CCR2; Allophycocyanine; clone: K036C2; lot: B183753

BioLegend; CCR5; Alexa Fluor 488; clone: J418F1; lot: B240234  
 BioLegend; CX3CR1; PE/Cy7; clone: 2A9-1; lot: B246272  
 R&D; TNFRI; clone: 16803; lot: IP0917071  
 R&D; TNFR2; clone: 22210; lot: AYF0417041  
 R&D; TNFalpha, clone: 1825; lot: HM3717081  
 Becton Dickinson; HLA-DR; BUV395; clone: G46-6; lot: 8205839  
 Abcam; Androgen Receptor; Alexa Fluor 488; clone: ER179(2); lot: GR238755  
 Abcam; Rabbit IgG; Alexa Fluor 488; clone: EPR25A; lot: GR274056

Secondary antibody:  
 ThermoFisher Scientific anti-mouse IgG (H+L) Alexa Fluor 594 clone: #A-11005; lot: 1697164  
 R&D isotype control clone: 11711; lot: IX2410121

## Validation

All antibodies were titrated with the cells of interest and checked with the help of the appropriate isotype control. The control stainings for Androgen Receptor, TNFRI and TNFR2 are shown in the supplementary information of the manuscript. The concentration for the neutralizing antibodies against TNF, TNFRI and TNFR2 from R&D were derived from the manufacturer's guidelines and cited references.

## Animals and other organisms

Policy information about [studies involving animals](#); [ARRIVE guidelines](#) recommended for reporting animal research

## Laboratory animals

C57BL/6J male and female mice were used for this study. At the time of the experiments the mice were 8 to 12 weeks old. More details on the mice used in this study have been included in the Methods section of this manuscript.

## Wild animals

The study did not involve wild animals.

## Field-collected samples

The study did not provide samples collected from the field.

## Ethics oversight

Animal experiments were performed under the agreement of the German animal protection law and were reviewed by the federal health authorities of the State of Hamburg (Behörde für Gesundheit und Verbraucherschutz) in accordance of the ARRIVE guidelines and registered under the permission number 51/17 and 01/15.

Note that full information on the approval of the study protocol must also be provided in the manuscript.

## Human research participants

Policy information about [studies involving human research participants](#)

## Population characteristics

The study included only healthy male and female participants, which were between 25 and 49 years old.

## Recruitment

Information of human blood donors were restricted to health status, sex and age for both study protocols.

## Ethics oversight

Both study protocols (PV5252 and PV5245) were approved by the committee of the medical association Hamburg.

Note that full information on the approval of the study protocol must also be provided in the manuscript.

## Flow Cytometry

### Plots

Confirm that:

- The axis labels state the marker and fluorochrome used (e.g. CD4-FITC).
- The axis scales are clearly visible. Include numbers along axes only for bottom left plot of group (a 'group' is an analysis of identical markers).
- All plots are contour plots with outliers or pseudocolor plots.
- A numerical value for number of cells or percentage (with statistics) is provided.

### Methodology

## Sample preparation

The detailed sample preparation in listed is the method section of the manuscript.

## Instrument

BD LSRFortessa

## Software

BD FACSDiva V8

Cell population abundance

Gating strategy

Tick this box to confirm that a figure exemplifying the gating strategy is provided in the Supplementary Information.

## Magnetic resonance imaging

### Experimental design

Design type

Design specifications

Behavioral performance measures

### Acquisition

Imaging type(s)

Field strength

Sequence & imaging parameters

Area of acquisition

Diffusion MRI  Used  Not used

### Preprocessing

Preprocessing software

Normalization

Normalization template

Noise and artifact removal

Volume censoring

### Statistical modeling & inference

Model type and settings

Effect(s) tested

Specify type of analysis:  Whole brain  ROI-based  Both

Anatomical location(s)

Statistic type for inference  
(See [Eklund et al. 2016](#))

Correction

### Models & analysis

n/a  Involved in the study

Functional and/or effective connectivity

Graph analysis

Multivariate modeling or predictive analysis
